# Supplementary material for: Neuroendocrine regulation of Drosophila metamorphosis requires TGFβ/Activin signaling
Source: Oxford University Press journal article supplement (doi:10.1242/dev.063412), 2011-05-26
Supplement: dev063412tables1.pdf [file dev063412tables1.pdf]

**Table S1. The RNAi constructs that give rise to larval arrest phenotype when expressed in the PG**

| <i>dSmad2</i> RNAi constructs                                                      | <i>punt</i> RNAi constructs                                                                  | <i>babo</i> RNAi constructs                                                                 |
|------------------------------------------------------------------------------------|----------------------------------------------------------------------------------------------|---------------------------------------------------------------------------------------------|
| #14609<br>(Vienna Stock Center)<br>Target sequence: cDNA<br>(nucleotides 652-1049) | #848 and #37279<br>(Vienna Stock Center)<br>Target sequence: cDNA<br>(nucleotides 1076-1247) | #853 and #3825<br>(Vienna Stock Center)<br>Target sequence: cDNA<br>(nucleotides 1771-1942) |
| #105687<br>(Vienna Stock Center)<br>Target sequence: 3' UTR                        | #26756<br>(Bloomington Stock Center)<br>Target sequence: cDNA<br>(nucleotides 785-1236)      | #41B3<br>(The O'Connor Lab)<br>Target sequence: cDNA<br>(nucleotides 1123-1640)             |
| #3A2<br>(The O'Connor Lab)<br>Target sequence: cDNA<br>(nucleotides 713-1136)      |                                                                                              |                                                                                             |
